# Supplementary material for: The Arabidopsis Lectin Receptor Kinase LecRK-I.8 Is Involved in Insect Egg Perception
Source: PubMed Central journal article supplement (PMC6524003; doi:10.3389/fpls.2019.00623), 2019-05-10
Supplement: Image_1.pdf [file Image_1.pdf]

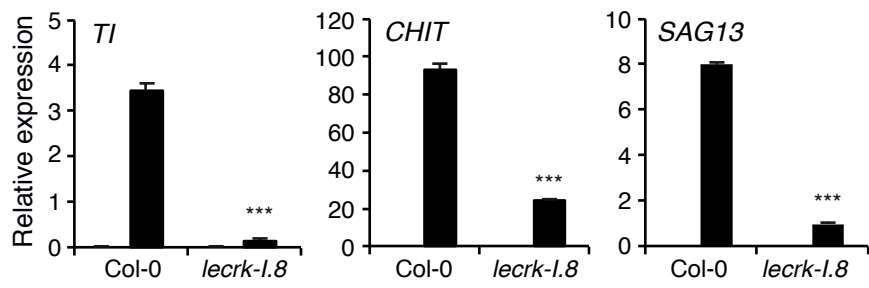

Figure S1
