# Supplementary material for: The Arabidopsis Lectin Receptor Kinase LecRK-I.8 Is Involved in Insect Egg Perception
Source: PubMed Central journal article supplement (PMC6524003; doi:10.3389/fpls.2019.00623), 2019-05-10
Supplement: Table_1.pdf [file Table_1.pdf]

**Table S1.** Primer list**A** T-DNA genotyping

| Mutant                        | T-DNA line   | LP primer              | RP primer              |
|-------------------------------|--------------|------------------------|------------------------|
| <i>lecrk-I.1</i> (At3g45330)  | SALK_052123  | G TTCCTGTTGACGTTAGCTCG | GTCTGTGGAATCTGCTTCAGC  |
| <i>lecrk-I.2</i> (At3g45390)  | SAIL_847_F07 | TCAGGCACTGGAAAACTCTG   | GAAGCAGAAACGACAGATTGG  |
| <i>lecrk-I.3</i> (At3g45410)  | SALK_087804C | TGCCATCTTACTTTTCCAACG  | ATAAGCAAGCCTCTTTCCAGC  |
| <i>lecrk-I.4</i> (At3g45420)  | SALK_091901  | TTTGTGGCAGAAGTCGTAACC  | AAATCAATGCATTCTGAACTGG |
| <i>lecrk-I.5</i> (At3g45430)  | GABI_777H06  | CGCTCTGCCTGTTATACTTGC  | ATTGGCTGAAGAAGAAGAGGC  |
| <i>lecrk-I.6</i> (At3g45440)  | GABI_353G10  | CTGGCCCCCTTAAAATTTCAG  | ATCAGGCAGCTCTAAGCTTCC  |
| <i>lecrk-I.7</i> (At5g60270)  | SAIL_230_F04 | CAAATGGTGACAACAACCTTGC | GGAGAGGAGGTTTTGGTGAAG  |
| <i>lecrk-I.8</i> (At5g60280)  | SALK_066416  | ACACCACAACCAACAGGTCTC  | CAGAAGCTGTTTCTCAATCGG  |
| <i>lecrk-I.9</i> (At5g60300)  | SALK_042209  | CTGAATACTTGCGTCTCCTGC  | CAGCTTGCGAGGTTATGATTG  |
| <i>lecrk-I.10</i> (At5g60310) | SALK_039426C | AGGATGAGGAACTTCAGGGAG  | GCGTAGTTTCATTGGCTCAAG  |
| <i>lecrk-I.11</i> (At5g60320) | GABI_757B03  | CAAAACCGCCTTTTCTAAAC   | TGCATTTTGAAACTCCAGAAAC |

**B** QPCR

| Gene                     | Fw primer                 | Rv primer                |
|--------------------------|---------------------------|--------------------------|
| <i>LecRK-I.1</i>         | CCCGGATCGAAAAGCATTCA      | GTTTTCTCCGGTTTCTTGGG     |
| <i>LecRK-I.2</i>         | CCCGGATCGAAAAGCTTTTG      | G TTCAGAGATGTCAAGGCTC    |
| <i>LecRK-I.3</i>         | TCCTAAGTTGGGAGCTGATG      | ACCAACATGAGGCTTCTCCA     |
| <i>LecRK-I.4</i>         | TGAAACTTGGGTTGCTCTGC      | ATGGTTCCACTGAAACTGGC     |
| <i>LecRK-I.5</i>         | TGCTGAGTTGAACGGTAGGT      | CTCAACTTGCACCCCGAATT     |
| <i>LecRK-I.6</i>         | CCAATGGTAGCCTTGACCAA      | GGGTCTTTCCCATGATCATG     |
| <i>LecRK-I.7</i>         | GAGTTCAATGGAAGGTTGGG      | GTTTTGCTTCAGGTAAGCCG     |
| <i>LecRK-I.8</i>         | CTACCTCAGGAAGACATAGC      | CTGCAGTATCCGAAAAGTGG     |
| <i>LecRK-I.9</i>         | TGGTGATGAAGGTGTGAAGC      | AGAACCGGTTTCTGGTCATC     |
| <i>LecRK-I.10</i>        | CTCTCAAGTCAGCAAGAGAC      | GAGCCATCTGATGATCGGAA     |
| <i>LecRK-I.11</i>        | GACTCATTTTGTGTGTGCGC      | GCTCTCAACAGTATCGAGCT     |
| <i>PR1</i> (At2g14610)   | GTGGGTTAGCGAGAAGGCTA      | ACTTTGGCACA TCCGAGTCT    |
| <i>CHIT</i> (At2g43570)  | GGAGAGTACTGCGACACAGAGAAA  | GGCAGGAACCTGGTCTTGAGCAA  |
| <i>TI</i> (At1g73260)    | CCTCGTGGTTGCTGGTCCAAA     | CCTCTCACATAGTCTTGACGAAA  |
| <i>SAG13</i> (At2g29350) | GTCGTGCATGTCAATGTTGG      | CCAAGGACAAACAGAGTTCCG    |
| <i>SAND</i> (At2g28390)  | AACTCTATGCAGCATTTGATCCACT | TGATTGCATATCTTTATCGCCATC |

**C** Cloning

Reporter line (pLecRK-I.8::NLS-GFP-GUS)

attB4-LecRKI8p GGGGACAACCTTTGTATAGAAAAGTTGTTAAGTTTCTAACAACCTTCCCTCT

attB1r-LecRKI8p GGGGACTGCTTTTTTTGTACAACTTGTGTTAATGCAACAAAGTGTTTG

Complementation line (*lecrk-I.8*|pLecRK-I.8::LecRK-I.8-mVENUS)

LecRKI8p-Fw TCCCCCGGGAAGTTTCTAACAACCTTCCCTCTT

LecRKI8cds-Rv GCGGGATCCTCGTCCAATTCCGTATTGAATCGA
